# 1     **Neutrophil-mediated Oxidative Stress and Albumin Structural Damage Predict** 2                                    **COVID-19-associated Mortality**

3     Mohamed A. Badawy,<sup>1,\*</sup> Basma A. Yasseen,<sup>1,\*</sup> Riem M. El-Messierey,<sup>2,\*</sup> Engy A. Abdel-Rahman,<sup>1,3\*</sup> Aya A.  
4     Elkhodiry,<sup>1,\*</sup> Azza G. Kamel,<sup>1,\*</sup> Asmaa M. Shedra,<sup>1</sup> Rehab Hamdy,<sup>1</sup> Mona Zidan,<sup>1</sup> Daa Al-Raawi,<sup>1</sup>  
5     Mahmoud Hammad,<sup>4</sup> Nahla Elsharkawy,<sup>5</sup> Mohamed El Ansary,<sup>6</sup> Ahmed Al-Halfawy,<sup>7</sup> Alaa Elhadad,<sup>4</sup>  
6     Ashraf Hatem,<sup>8</sup> Sherif Abouelnaga,<sup>4</sup> Laura L. Dugan,<sup>9</sup> and Sameh S. Ali<sup>1,†</sup>

7     <sup>1</sup> Research Department, Children’s Cancer Hospital Egypt 57357, Cairo, Egypt.

8     <sup>2</sup> Infectious Disease Unit, Internal Medicine Department, Faculty of Medicine, Cairo University, Cairo,  
9     Egypt.

10    <sup>3</sup> Pharmacology Department, Faculty of Medicine, Assuit University, Assuit, Egypt.

11    <sup>4</sup> Pediatric Oncology Department, National Cancer Institute, Cairo University and Children's Cancer  
12    Hospital 57357, Cairo, Egypt.

13    <sup>5</sup> Clinical pathology department, National Cancer Institute, Cairo University and Children's Cancer  
14    Hospital 57357, Cairo, Egypt.

15    <sup>6</sup> Department of Intensive Care, Faculty of Medicine, Cairo University, Cairo, Egypt.

16    <sup>7</sup> Department of Pulmonary Medicine, Faculty of Medicine, Cairo University, Cairo, Egypt.

17    <sup>8</sup> Department of Chest Diseases, Faculty of Medicine, Cairo University, Cairo, Egypt.

18    <sup>9</sup> Division of Geriatric Medicine, Department of Medicine, Vanderbilt University Medical Center; and VA  
19    Tennessee Valley Geriatric Research, Education and Clinical Center (GRECC), Nashville, TN, United  
20    States.

21    **Running Title:** Damage of Human Serum Albumin and COVID-19 Mortality.

22    \*Equal contributions

23    † Corresponding author: Prof. Sameh S. Ali, Research Department, Children’s Cancer Hospital Egypt  
24    57357, Cairo, Egypt, Tel: +202225351500 Ext-7233, [sameh.ali@57357.org](mailto:sameh.ali@57357.org)

25    **Word count for text:** 5094; **Abstract word count:** 249

26    **Number of Figures:** 5 colored figures; **Number of Tables:** 2 + 1 supplementary table.

27    **Reference count:** 45

28 **Abstract**

29 Human serum albumin (HSA) is the frontline antioxidant protein in blood with established anti-  
30 inflammatory and anticoagulation functions. Here we report that COVID-19-induced oxidative stress  
31 inflicts structural damages to HSA and is linked with mortality outcome in critically ill patients. We  
32 recruited 25 patients who were followed up for a median of 12.5 days (1-35 days), among them 14 had  
33 died. Analyzing blood samples from patients and healthy individuals (n=10), we provide evidence that  
34 neutrophils are major sources of oxidative stress in blood and that hydrogen peroxide is highly  
35 accumulated in plasmas of non-survivors. We then analyzed electron paramagnetic resonance (EPR)  
36 spectra of spin labelled fatty acids (SLFA) bound with HSA in whole blood of control, survivor, and non-  
37 survivor subjects (n=10-11). Non-survivors' HSA showed dramatically reduced protein packing order  
38 parameter, faster SLFA correlational rotational time, and smaller S/W ratio (strong-binding/weak-  
39 binding sites within HSA), all reflecting remarkably fluid protein microenvironments. Stratified at the  
40 means, Kaplan–Meier survival analysis indicated that lower values of S/W ratio and accumulated H<sub>2</sub>O<sub>2</sub> in  
41 plasma significantly predicted in-hospital mortality (S/W<0.16, 80% (9/12) vs. S/W>0.16, 20% (2/10),  
42  $p=0.008$ ; plasma [H<sub>2</sub>O<sub>2</sub>]>7.1  $\mu$ M, 83.3% (5/6) vs. 16.7% (1/6),  $p=0.049$ ). When we combined these two  
43 parameters as the ratio ((S/W)/[H<sub>2</sub>O<sub>2</sub>]) to derive a risk score, the resultant risk score lower than the  
44 mean (< 0.0253) predicted mortality with 100% accuracy (100% (6/6) vs. 0% (0/6), logrank  $\chi^2 = 12.01$ ,  $p$   
45 =  $5 \times 10^{-4}$ ). The derived parameters may provide a surrogate marker to assess new candidates for COVID-  
46 19 treatments targeting HSA replacements.

47 **Keywords: Critically ill COVID-19 patients, COVID-19 Mortality, Neutrophils, Oxidative Stress, Human**  
48 **Serum Albumin Damage, Spin Labels, Electron Paramagnetic Resonance**

## 49 **Introduction**

50 COVID-19 pandemic continues as a global health crisis while the underlying SARS-CoV-2 virus  
51 defies all attempted treatment strategies. While writing this report there have been more than 135  
52 million confirmed cases including around 3 million deaths worldwide according to the World Health  
53 Organization Coronavirus Disease Dashboard (<https://covid19.who.int/>). Although 50% of cases are  
54 reported to be in the 25-64 age group, the percentage of deaths increases dramatically with age, and  
55 approximately 75% of deaths are in those aged 65 years and above ([COVID-19 Hospitalization and Death  
56 by Age | CDC](#)). People in the age groups 30-39 years, 40-49 years, and 50-64 years are 4, 10, and 30  
57 times more likely to die from COVID-19 complications compared to 18-29 years' age group.  
58 Nevertheless, molecular and cellular factors contributing to mortality outcome in a homogeneous  
59 cohort of patients are not yet clear. Lack of diagnostic markers that predict mortality in COVID-19  
60 patients impedes current efforts to siege the pandemic. It is thus critical to identify prognostic tests that  
61 can assess the risk of death in critically ill patients to guide clinical protocols and prioritize interventions.  
62 Furthermore, mechanistic clues for determining the underlying molecular factors contributing to the  
63 hypercoagulability, inflammation, and cytokine storm have been so far illusive. It is therefore imperative  
64 to intensify efforts focusing on understanding the molecular pathophysiology of COVID-19 infection and  
65 to identify prognostic markers to guide and prioritize clinical decisions.

66 Human serum albumin (HSA) is the most abundant constituent of soluble proteins in the  
67 circulatory system. HSA has been suggested and used as a diagnostic and prognostic marker of  
68 numerous diseases and conditions including ischemia, rheumatoid arthritis, cancer, septic shock among  
69 many others. In addition to its numerous physiological and pharmacological functions including the  
70 maintenance of blood/tissue osmotic balance (1), blood pH, metal cation transport and homeostasis (2,  
71 3), nutrients and drug shuttling (4, 5), toxin neutralization (6, 7), HSA is suggested to be a major  
72 circulating antioxidant (8, 9). HSA can remarkably bind with a diverse array of drugs and toxins thus

73 controlling their bioavailability and pharmacologic effects (10). It has been previously shown that more  
74 than 70% of the free radical-trapping capacity of serum was due to HSA (reviewed in (11)). Importantly,  
75 several reports indicated that inflammation enhances vascular permeability of various tissues to HSA  
76 apparently to confer antioxidant beneficial effects against reactive species released by activated  
77 neutrophils (12-14). Although currently without direct experimental evidence, neutrophilia-mediated  
78 oxidative stress was implicated in the COVID-19 pathology and speculated to exacerbate the  
79 inflammatory immune response eventually causing multi organ failure and death (15). We hypothesized  
80 that COVID-19-mediated oxidative stress may be differentially reflected in HSA's structure and functions  
81 and employed electron paramagnetic resonance (EPR) spin labeling spectroscopy to explore HSA's  
82 structural changes in correlation with severity and mortality of critically ill COVID-19 patients.

83 Spin labeled long-chain fatty acids (SLFA) are established probes to explore structural and  
84 functional changes in albumin by EPR spectroscopy (16, 17). This approach relies on the well-studied  
85 ability of albumin to strongly and exclusively bind with fatty acids in blood. Albumin has at least seven  
86 different specific binding sites for long chain fatty acids located in different domains within the protein  
87 (18-20). Effectively, structural and functional changes in HSA may be assessed through the detection of  
88 parallel changes in mobility and binding affinity of SLFAs, in addition to the distribution of the spin labels  
89 on the albumin molecule (17). EPR spectra of spin labels bound to different domains of the protein  
90 provide information on the local fatty acids/protein interactions, which may probe changes in the  
91 overall structure of the protein under unfolding or damaging conditions; Fig. 1A, (18). Here we compare  
92 changes that occur to the mobility, binding affinity, and distribution of the HSA-bound SLFA in whole  
93 blood and plasma from COVID-19 patients in critical care unit relative to those observed in normal  
94 healthy individuals.

## 95 **Methods**

96 **Study design and participants**

97 The present study aims to analyze HSA protein configuration statuses in the most severe cases of COVID-  
98 19 in comparison with control subjects. This is a prospective observational cohort study of patients with  
99 confirmed RT-PCR positive COVID-19. Nasopharyngeal swab RT-PCR results and Lung CT scans were  
100 combined to classify severe symptomatic COVID-19 cases. All patients were recruited from Kasr Alainy  
101 Cairo University Hospital/ ICU-facility at the Internal Medicine Quarantine Hospital. Supportive therapy  
102 including supplemental oxygen and symptomatic treatment were administered as required. Patients  
103 with moderate to severe hypoxia (defined as requiring fraction of inspired oxygen [FiO<sub>2</sub>] ≥40%) were  
104 transferred to the intensive care for further management including invasive mechanical ventilation  
105 when necessary. Patients recruited in the current study were divided into two arms based on future  
106 mortality outcome: Those survived past 10 days following blood samples collection (Sev-R) and those  
107 who died within 10 days of samples collection (Sev-D).

108 No power analysis was done. Sample size was based on sample availability and collection continued until  
109 a total of N=25 has been reached for COVID-19 patients diagnosed as severely infected with SARS-CoV-2  
110 and admitted to the ICU during the period from 13 October 2020 to 25 January 2021. Within the follow-  
111 up time 14 patients had died. However, in a few cases and due to leukopenia or blood samples  
112 insufficiency to run every experiment on each subject, a number of 6-11 were analyzed and reported  
113 per condition. Nevertheless, all available samples were investigated by blinded operators and were all  
114 included in the final analysis. Demographic and clinical data of the studied 25 COVID-19 confirmed  
115 positive cases were categorized according to mortality and used for correlative analyses (Table 1). No  
116 randomization was done and clinical data were made available after EPR data collection and analysis  
117 have been performed. Patients who survived 10-days post sample collections were considered survivors  
118 (Sev-R) while those died within this period were placed in the Sev-D group.

119 Written informed consents were obtained from participants in accordance with the principles of the  
120 Declaration of Helsinki. For COVID-19 and control blood/plasma collection, Children's Cancer Hospital's  
121 Institutional Review Board (IRB) has evaluated the study design and protocol, IRB number 31-2020  
122 issued on July 6, 2020.

### 123 **Electron paramagnetic resonance (EPR) measurements**

124 We measured EPR spectra at 37 °C using a Benchtop Magnetech MiniScope MS5000 spectrometer (now  
125 Bruker Biospin, Berlin) equipped with Biotemperature control and computerized data acquisition and  
126 analysis capabilities. Typical instrumental parameters during these measurements were: microwave  
127 frequency 9.47 GHz, microwave power 10 mW, modulation frequency 100 kHz, modulation amplitude  
128 0.2 mT, magnetic field range 332-342 mT. Each spectrum was the average of 5 scans with scan time of  
129 60 s. Spin-labelled stearic acids (Fig. 1): 2-(3-carboxypropyl)-4,4-dimethyl-2-tridecyl-3-oxazolidinyloxy (5-  
130 doxyl-stearic acid, 5-DSA) and 2-(14-carboxytetradecyl)-2-ethyl-4,4-dimethyl-3-oxazolidinyloxy (16-  
131 doxyl-stearic acid, 16-DSA) were purchased from Aldrich Chemical Co. (Milwaukee, U.S.A.). Spin labeled  
132 fatty acid (SLFA)-serum albumin complexes were formed as recommended (17) in 0.01 M phosphate  
133 buffer (pH 7.4). Conditions were optimized to avoid aggregation of free SLFA and to minimize  
134 contributions from albumin-unbound SLFA. Signals were stable over the measurement time and at least  
135 up to 1 h afterward as observed by following time evolution of the recorded EPR spectra.

136 **Analysis of biophysical EPR parameters:** Fluidity measurement was carried out as we reported (21) and  
137 explained (22) previously. Nitroxyl radicals SLFA probes were used to determine local fluidity near the  
138 protein/aqueous interface (5-DSA) or the hydrophobic protein cores (16-DSA) of HSA. Whole blood or  
139 collected plasma from all subjects were labelled with 5-DSA or 16-DSA. Ethanolic solutions (0.02 M) of  
140 the spin labels were added to the blood/plasma in the ratio 1:100 and the cells were measured at 37 °C.

141 From the spectrum of 5-DSA an order parameter ( $S$ ) was derived by measuring the outer and inner  
142 hyperfine splitting  $2T_{\parallel}$  and  $2T_{\perp}$  as defined in Fig. 1B (23, 24) using the formula:

143

$$144 \quad S = \frac{T_{\parallel} - T_{\perp}}{T_{zz} - T_{xx}} \cdot \frac{a_N}{a'_N}$$

145

146 where

147

$$148 \quad a_N = \frac{1}{3(T_{zz} + 2T_{xx})} ; a'_N = \frac{1}{3(T_{\parallel} + 2T_{\perp})}$$

149

150  $T_{xx}$  and  $T_{zz}$  are principal values of hyperfine tensor  $T$  taken as 0.61 mT and 3.24 mT; respectively (24, 25).

151 To estimate fluidity of the inner lipophilic protein compartment, we used 16-DSA, i.e. a spin probe  
152 containing the nitroxide group attached on C16 that is located on the opposite terminal relative to the  
153 charged carboxyl fatty acid terminus. Rotational correlation time ( $\tau_c$ ), which is taken as a measure of  
154 microenvironment fluidity in the fatty acid carrier sites in the HSA protein core was calculated as (26):

155

$$156 \quad \tau_c = 6.6 \times 10^{-10} \times \Delta h_{+1} \left[ \left( \frac{h_{+1}}{h_{-1}} \right)^{\frac{1}{2}} - 1 \right]$$

157

158 Where the parameters  $\Delta h_{+1}$ ,  $h_{+1}$ , and  $h_{-1}$  are determined from EPR spectra as shown in Fig. 1C.

159 16-DSA spectra (Fig. 1C) were also analyzed to obtain the ratio between weakly (W) and strongly (S)  
160 bound subpopulations of the spin label in sterically hollow versus relatively jammed protein  
161 microenvironments (22, 24).

162 **Phenotyping of peripheral blood by flow cytometry**

163 Citrate-anticoagulated whole peripheral blood was incubated with RBCs lysis buffer for 15 min. Lysed  
164 blood was then centrifuged at 500 X-g for 5 min. Cells were washed twice with phosphate buffered  
165 saline (PBS) and then resuspended in PBS. Distribution status of platelets, neutrophils, monocytes and  
166 lymphocytes was measured in whole blood samples by 13-color flow cytometry as described using  
167 CytoFLEX system (Beckman Coulter Life Sciences CytoFLEX benchtop flow cytometer). Suspended cells  
168 were incubated with combinations of anti-human monoclonal antibodies for subset identification as  
169 follows: CD-42b-PE (Beckman Coulter life sciences, IM1417U) for platelets, CD14-PC7 (Beckman Coulter  
170 life sciences, A22331) for monocytes, CD66b-APC-Alexa Fluor 750 for neutrophils (Beckman Coulter life  
171 sciences, B08756) and CD3-ECD (Beckman Coulter life sciences, IM2705U) for lymphocytes cells were  
172 incubated for 30 minutes in the dark at room temperature. At the end of the incubation period, cells  
173 were washed with PBS and resuspended in 300  $\mu$ l PBS. Samples were then analyzed by flow cytometry  
174 for gating platelet specific CD42b-PE positive population, neutrophil specific CD66b-APC-Alexa Fluor 750  
175 positive population, monocytes specific CD14-PE positive population and lymphocytes specific CD3-ECD  
176 positive population. A number of 20,000 events were acquired and analyzed using CytExpert software to  
177 determine the percent and mean fluorescence intensities (MFI) of analyzed cell subsets.

#### 178 **Measurement of ROS by flow cytometry**

179 The intracellular ROS generation by different cell populations was measured in whole blood samples  
180 using 2',7'-dichlorofluorescein-diacetate (DCF, Sigma Aldrich, D6883). Suspended cells were incubated  
181 with DCF (20  $\mu$ M) and combinations of monoclonal antibodies; CD-42b-PE (Platelets), CD14-PC7  
182 (monocytes), CD66b-APC-Alexa Fluor 750 (neutrophils), and CD3-ECD (lymphocytes) for 30 minutes at  
183 room temperature in the dark. Cells were then washed with PBS and resuspended in 300  $\mu$ l of PBS.  
184 20,000 events were recorded and analyzed using CytExpert program.

#### 185 **Determination of hydrogen peroxide concentrations in plasma**



186 Catalase was used to specifically and quantitatively determine levels of hydrogen peroxide in identical  
187 plasma volumes collected from the study subjects. Oxygen levels are monitored and recorded while 50  
188  $\mu\text{L}$  batches of plasma from control, Sev-R, and Sev-D subjects sequentially infused into tightly air-  
189 controlled O<sub>2</sub>k chamber containing catalase (315 Units/mL) in deoxygenated buffer. A continuous  
190 stream of pure nitrogen gas was blown over the chamber's sealing cap to prevent oxygen diffusion into  
191 the working solution. In addition to the initial rise due to residual oxygen in the added plasma samples,  
192 the decomposition of hydrogen peroxide in these samples produced oxygen in a quantitative manner;  
193 i.e. decomposition of one mole of H<sub>2</sub>O<sub>2</sub> produced ½-mole O<sub>2</sub>. To verify the assay, we measured the  
194 released oxygen upon adding increasing concentrations of standard hydrogen peroxide solution in PBS  
195 buffer. Linear fitting of the plotted [O<sub>2</sub>] versus [H<sub>2</sub>O<sub>2</sub>] relation yielded a slope =  $0.47 \pm 0.03$  (Pearson's  $r =$   
196  $0.994$ ,  $p = 5.6 \times 10^{-4}$ ), which is very close to the theoretically expected value of 0.5.

#### 197 **Measurement of ROS in isolated neutrophils by fluorescence imaging**

198 The intracellular ROS generation of isolated neutrophils was detected and quantified using the ROS-  
199 sensitive DCF dye. Isolated cells were seeded and incubated for 30 minutes at 37°C followed by  
200 centrifugation to form a monolayer. Cells were then stained with DCF at a final concentration of 0.3 mM  
201 in PBS for 30 minutes. Cells were washed and stained with DAPI (Hoechst 33342 Solution,  
202 ThermoFischer Scientific, 62249) at a final concentration of 10  $\mu\text{M}$  in PBS for 30 minutes at 37°C.  
203 Cytation 5 Cell Imaging Multi-Mode Reader (Agilent) was used to acquire images using 20X lens and the  
204 proper fluorescence filter cubes ( $\lambda_{\text{ex}} = 500 \pm 12 \text{ nm}$  and  $\lambda_{\text{em}} = 542 \pm 14 \text{ nm}$ ). Images were processed to  
205 quantify fluorescence intensity using Gen5 software package 3.08.

#### 206 **Determination of plasma albumin concentrations**

207 Albumin concentration in plasma was measured using bromocresol green (BCG) dye as the color  
208 intensity of the complex formed is proportional to albumin concentration. Standard curve was

209 generated using standard albumin and samples were measured in 96 well plate at 630 nm using  
210 Cytation 5 (Agilent). Concentrations were calculated using the equation generated from standard curve  
211 and presented in mg/mL.

## 212 **Statistical analysis**

213 Statistical analysis and data graphing were performed using OriginPro 2017 (OriginLab Corporation,  
214 Northampton, USA). For comparisons of means between three or more independent groups, Tukey test  
215 ANOVA for multiple comparison was performed. For correlation analysis, spearman rank correlation was  
216 performed. Pearson's correlation coefficient was calculated for measuring the association between  
217 variables of interest based on the method of covariance which also gives information about the  
218 magnitude of the association, or correlation, as well as the direction of the relationship.  $p$ -values < 0.05  
219 for correlations or means' comparisons were considered significant. Categorical variables are reported  
220 as counts and percentages while continuous variables are expressed as mean  $\pm$  standard deviation.  
221 Differences between percentages were assessed by Pearson's  $\chi^2$  tests or Fisher exact tests when the  
222 number of observations per group were less than 5. The  $\chi^2$  tests provided results that tested the  
223 hypothesis that the mortality and a given variable (e.g. sex or a comorbidity) are independent. When  $p$  is  
224 less than the significant level of 0.05, there is significant evidence of association between mortality and  
225 the variable. Log-rank Kaplan–Meier survival analyses were carried out to estimate probability of  
226 survival of COVID-19 patients in relation with cut-off thresholds arbitrarily stratified at mean values of  
227 various parameters. The log-rank test for trends reports a  $\chi^2$ -value and computes a  $p$  value testing the  
228 null hypothesis that there is no linear trend between column order and median survival.

## 229 **Data sharing statement**

230 Original datasets and detailed protocols are available upon request from the corresponding author  
231 [sameh.ali@57357.org](mailto:sameh.ali@57357.org).

232

## 233 **Results**

### 234 ***Demographic, clinical, and laboratory hematologic characteristics of COVID-19 patients***

235 **Table 1** lists demographic data, comorbidities, ongoing medications, and administered anti-  
236 COVID-19 medications applied to treat current study participants that were divided into survivors (Sev-  
237 R) and deceased (Sev-D). Compared with recovered, deceased patients' mean age was slightly older  
238 (Tukey ANOVA,  $p < 0.05$ ). No other clinical or demographic characteristic showed statistically significant  
239 difference between Sev-R and Sev-D groups when analyzed by Pearson's Chi-Square test except that the  
240 frequency of remdesivir administration was significantly higher in Sev-D groups ( $p < 0.05$ ). In **Table 2** we  
241 show and statistically compare laboratory results of survivors vs. non-survivor COVID-19 groups.  
242 Although when comparing all parameters in the two COVID-19 groups we observed changes following  
243 the same reported trends in the literature, means' comparisons by Tukey test reported non-significant  
244 changes with strong trends observed only for C reactive protein (greater levels in Sev-D group,  $p =$   
245  $0.050$ ) and albumin (lower levels in Sev-D group,  $p = 0.067$ ). Nevertheless, non-survivors' blood carried  
246 the frequently observed hallmarks of increased CRP, D-dimer, IL-6, ferritin, and the liver enzymes ALT  
247 and AST (Reviewed in: (27, 28)). However, it is conceivable that the clinical severe category and the  
248 same ICU status of patients in the two groups in addition to relatively small sample size underlie the  
249 observed lack of robust statistical differences between these parameters.

### 250 ***Neutrophils are a major source of reactive oxygen species***

251 It has been recently proposed that the high neutrophil-to-lymphocyte ratio observed in critically  
252 ill COVID-19 patients may tip the redox homeostasis due to increased reactive oxygen species  
253 production (15). Our hypothesis implicates elevated oxidative stress as a major cause of HSA damage in

254 severe COVID-19 patients. As a result, we started by following the dependence of clinical outcomes and  
255 mortality on ROS levels in blood cells. First, we used flowcytometry to assess percentages of neutrophils,  
256 lymphocytes, and platelets in all patients as described in Materials and Methods (Fig. 2A). Furthermore,  
257 we used the ROS-sensitive DCF dye to probe intracellular ROS levels in various cell populations in whole  
258 blood from all groups. Fig. 2 shows that while lymphocyte counts decrease, a parallel dramatic increase in  
259 neutrophil counts (% total) was observable when going from Control ( $40.78 \pm 14.0$ ,  $n=9$ ) to Sev-R ( $64.0 \pm$   
260  $20.0$ ,  $n=10$ ) to Sev-D ( $76.4 \pm 6.8$ ,  $n=11$ ) groups (overall ANOVA  $p = 3.9 \times 10^{-5}$ ). Similar trend was clearly  
261 seen in the heat map depicting parameters for all patients analyzed by flow cytometry (Fig. 2B). It is also  
262 clear from Fig. 2B&C that changes in DCF-positive neutrophils follows similar trend observed for  
263 neutrophil counts. To confirm this relation we compared neutrophil counts with DCF-positive neutrophil  
264 counts and found that the two parameters were strongly correlated (Pearson's  $r = 0.8$ ,  $p = 3 \times 10^{-7}$ ), Fig.  
265 2C. Moreover, both parameters individually showed statistically significant increases in both of the  
266 studied COVID-19 groups when compared with control group (Fig. 2D&E). These results suggest that  
267 neutrophils are major sources of elevated oxidative stress in critically ill patients. Note that the observed  
268 trends in platelets, lymphocyte, neutrophils, and neutrophil-to-lymphocyte ratio (NLR) are similar to  
269 reported values (29, 30).

### 270 ***Hydrogen peroxide levels in plasma correlate with mortality***

271 Next, we reasoned that elevated oxidative stress in both groups with critical COVID-19 infection  
272 would be echoed in plasma levels of hydrogen peroxide. We used a highly specific catalase-based assay  
273 that we developed and verified in our laboratory to quantify [ $H_2O_2$ ] in plasma samples of all groups. The  
274 assay relies on high resolution detection and quantification of released oxygen due to hydrogen  
275 peroxide decomposition by catalase, Fig. 3A&B. We constructed a calibration curve to confirm the  
276 catalase-mediated  $H_2O_2$  to  $O_2$  stoichiometric conversion (Fig. 3B). A linear relation was obtained with  
277 zero intercept and slope of  $0.47 \pm 0.03$  which closely matches the theoretically expected value of 0.5

278 (95% CI: 0.37–0.56,  $p = 5.6 \times 10^{-4}$ , Pearson's  $r = 0.994$ ). Indeed, we detected striking differences between  
279 groups even with relatively small sample sizes (Mean $\pm$ SD, Control, n=7: 2.57 $\pm$ 0.57, Sev-R, n=6: 5.37 $\pm$ 1.0,  
280 Sev-D, n=7: 8.8 $\pm$ 1.7 ; overall ANOVA  $p$ -value =  $1.15 \times 10^{-7}$  ; Fig. 3C). The differences between groups have  
281 reached statistical significance (Sev-R vs. Control, 95% CI: 1.08–4.51,  $p = 0.0017$ ; Sev-D vs. Control, 95%  
282 CI: 4.58–7.87,  $p = 0.0$ ; Sev-D vs. Sev-R, 95% CI: 1.72–5.15,  $p = 2.3 \times 10^{-4}$ ). It appears from these results  
283 that a measure of oxidative stress; *i.e.* [H<sub>2</sub>O<sub>2</sub>] in plasma is doubled in survivors and quadrupled in  
284 deceased COVID-19 patients relative to controls' plasma average levels.

285 To confirm this finding we performed DCF fluorescence imaging on freshly isolated neutrophils  
286 of representative group of individuals from each group, Fig. 3D. We simultaneously stained neutrophils'  
287 nuclei with DAPI (blue stain) to follow nuclear morphologic changes and DNA diffusion in all groups.  
288 Although requiring more detailed studies, a closer look on the acquired images of DAPI-stained  
289 neutrophils from a survivor patient showed significantly reduced average neutrophil size (control DNA  
290 area, 144.8  $\pm$  93.7  $\mu\text{m}^2$  (133 cells analyzed) vs. Sev-R DNA area, 36.0  $\pm$  7.5  $\mu\text{m}^2$ , (241 cells analyzed),  
291 Welsh corrected two samples t test  $p = 0$ ) with tendencies towards more condensed, more segmented  
292 nuclei and frequent C shaped chromatin. However, neutrophils from a non-survivor exhibited diffused  
293 chromatin and possessed in average a 26% larger DNA area than normal cells and roughly 5 times that  
294 of Sev-R neutrophils (DNA area (97 cells analyzed), 182.7  $\pm$  171  $\mu\text{m}^2$ ,  $p = 0$  vs. both control and Sev-R  
295 groups). Inspection of the DCF fluorescence images indicated that the non-survivor's neutrophils  
296 contained larger populations of what appears to be toxic granules and cytoplasmic vacuoles that are  
297 highly ROS-positive. Analysis of mean DCF fluorescence intensities (MFI) per cell confirmed results  
298 obtained by flow cytometry and catalase assay reporting increased levels of ROS in the order control <<  
299 Sev-R < Sev-D (DCF MFI  $\pm$  SD ( $\times 10^3$ ): Control (282 cells analyzed), 6.7  $\pm$  0.7; Sev-R (351 cells analyzed),  
300 10.9  $\pm$  0.9; Sev-D (368 cells analyzed), 13.0  $\pm$  1.1, Welsh corrected two samples t test,  $p = 0$  for all  
301 comparisons).

302 ***EPR-determined biophysical parameters reflecting albumin conformational changes are consistent***  
303 ***predictors of COVID-19 mortality***

304 It has been previously shown that non-survivor COVID-19 patients exhibit mild but consistent  
305 hypoalbuminemia relative to survivors (31). We started by assessing albumin levels in the studied  
306 cohort of subjects to confirm if they follow similar trends. We found that [albumin] in plasma decreased  
307 in the order Control > Sev-R >> Sev-D (Mean±SD, Control, n=8: 40.45±10.93 mg/mL, Sev-R, n=8:  
308 30.66±10.99 mg/mL, Sev-D, n=10: 24.71±5.88 mg/mL; overall ANOVA *p*-value 0.006; Fig. 4A). We only  
309 detected statistically significant decrease in [albumin] in plasma of Sev-D group (Sev-R vs. Control, 95%  
310 CI: -21.44–1.87, *p* = 0.11; Sev-D vs. Control, 95% CI: -26.79– -4.67, *p* = 0.004; Sev-D vs. Sev-D, 95% CI: -  
311 17.0–5.11, *p* = 0.38). The reference range of HSA concentration in serum is approximately 35-50 mg/mL,  
312 but we and other groups found that COVID-19 associated mortality correlates with lowered [albumin] <  
313 30 mg/mL (31). However, high prevalence of hypoalbuminemia in numerous disease states and the  
314 age/sex-dependent wide dynamic range of this protein concentration limits its diagnostic utility (32). As  
315 a result, we investigated biophysical parameters pertaining to HSA protein configuration in whole blood  
316 and plasma of all groups as reflectors of this critical protein functions.

317 Previous studies reported that allosteric changes in HSA may be utilized to reflect critical  
318 functional changes in albumin and explored diagnostic and prognostic values of these changes in cancer  
319 (17, 33). It has also been found that long chain fatty acids binding alters the interactive binding of  
320 ligands in the two major drug binding sites of HSA (34). We employed EPR spectroscopy to probe SLFAs'  
321 binding statuses and protein configuration in all groups as detailed in the Methods' section above.  
322 Analysis of the 5-DSA and 16-DSA EPR spectra revealed remarkable changes in spectral features  
323 between control and COVID-19 groups (Fig. 4B, 5-DSA; Fig. 4C, 16-DSA in whole blood). For example, the  
324 hyperfine coupling tensor element  $2T_{||}$  (defined in Fig. 1B and used to calculate the protein packing order  
325 parameter *S*) is sensitive to microenvironmental effects (such as polarity, H-bonding, electrostatic

326 interactions, etc.) on the spin probe that is localized in one of the HSA native fatty acids binding pockets.  
327 Also, the S/W ratio (see Fig. 1C) corresponding to strongly-bound/weakly-bound populations of 16-DSA  
328 spin probe may reflect changes in protein folding that can alter protein-fatty acid interactions.  
329 Furthermore, the rotational correlation time  $\tau_c$  which is a measure of the spin probe rotational mobility  
330 is also analyzed.

331 Calculated EPR spectral parameters for all groups are listed in Supplementary Table 1 including  
332 exact ANOVA and Tukey test  $p$  values along with the number of subjects analyzed. Both 5-DSA and 16-  
333 DSA were used to probe the degree of local interactions in sites where the spin labeled fatty acid is  
334 buried in the protein interior (high mobility, 16-DSA) and closer to the protein-aqueous interface (low  
335 mobility due to interactions with water molecules and polar amino acids, 5-DSA)(35). Indeed, 5-DSA  
336 reflected significantly greater  $S$  parameter values relative to 16-DSA both in plasma and in whole blood  
337 (Fig. 4D). However, independent of the spin probe and both in plasma and whole blood samples, the  
338 order parameter has been consistently lower in Sev-R which was further decreased in Sev-D patients  
339 relative to control group (Fig. 4D). In whole blood, similar results that showed more statistically robust  
340 differences have been observed.

341 Calculations of  $\tau_c$  as described in Methods showed rotational mobility of 16-DSA is significantly  
342 faster when bound with HSA from COVID-19 patients relative to that from control subjects in plasma or  
343 whole blood. Finally, similar trends have been observed for the S/W parameter which signifies  
344 contributions of the strongly and weakly bound components of 16-DSA in different fatty acids pockets.  
345 Taken together, these results indicate that COVID-19 pathology is associated with extensive structural  
346 changes in the HSA protein that imply the prevalence of malfunctional derivatives of this critical protein.

347 ***Hampered water accessibility into HSA/fatty acid pockets in whole blood of COVID-19 patients***

348 We followed water accessibility towards deep pockets carrying the spin labels through kinetic  
349 analysis of the nitroxide radical EPR silencing by the water-soluble ascorbate anion (36); Fig. 4(G-J).  
350 Under matching experimental conditions, 16-DSA and 5-DSA/HSA signals in whole blood of control  
351 subjects decayed remarkably faster when compared with both Sev-R and Sev-D (n=3 per group, p<0.05).  
352 Weaker and slower disappearance of the EPR signal of COVID-19 patients by ascorbate suggests less  
353 accessible space towards the nitroxide moiety of the spin label within the protein. It is clear from these  
354 data that HSA of COVID-19 patients is generally less water-accessible relative to control ones. However,  
355 the core of the HSA of both COVID-19 groups were not significantly different in terms of water-  
356 accessibility.

357 ***Association of EPR-determined HSA structural changes with neutrophil counts and measures of***  
358 ***oxidative stress***

359 In order to verify our proposed links between oxidative stress and albumin damage we applied  
360 linear correlations between plasma levels of hydrogen peroxide and EPR-calculated parameters  
361 pertaining to protein packing order parameter (S), fatty acid mobility ( $\tau_c$ ), and S/W ratio in all groups  
362 (n=19-26, Fig. 5A-D). Furthermore, to substantiate our suggestion that neutrophils are major sources of  
363 oxidative stress implicated in COVID-19 severity and mortality, we explored linear correlations between  
364 the populations of DCF positive neutrophils and  $\tau_c$  (Fig. 5E) or S/W ratio (Fig. 5F). Despite relatively small  
365 numbers of subjects analyzed, correlations of biophysical parameters showed moderate-to-strong  
366 negative correlations with  $[H_2O_2]$  in plasma or with DCF positive populations (% of total); Pearson's r = -  
367 0.6– -0.76, p < 0.01 for all correlations. These observations may suggest that neutrophil-mediated  
368 oxidative stress in critically ill COVID-19 patients is a potential contributor to the observed structural  
369 changes in HSA of those patients.



370 **Analysis of Kaplan–Meier estimates of time-to-mortality from blood sample collections during ICU**

371 **hospitalization**

372 Finally, we stratified patients into two groups, patients showing values below the means and  
373 patients with values above the means of each of the studied parameters: (*i.e.* S/W mean=0.1639 (0.090-  
374 0.261); plasma [albumin] mean = 0.26.69 mg/mL (16.42-51.48); and plasma [H<sub>2</sub>O<sub>2</sub>] mean = 7.1 μM (4.4-  
375 11.6)). Patients with lower values of the S/W ratio showed significantly higher in-hospital mortality  
376 (81.8% vs. 18.2%, logrank  $\chi^2 = 6.95$ ,  $p = 0.008$ , Fig. 5G). Similarly, patients with accumulated H<sub>2</sub>O<sub>2</sub> in their  
377 plasma showed higher mortality (83.3% vs. 16.7%, logrank  $\chi^2 = 3.85$ ,  $p = 0.049$ , Fig. 5H). However, when  
378 we combined these two parameters to derive a risk score as the ratio ((S/W)/[H<sub>2</sub>O<sub>2</sub>]), the resultant risk  
379 score lower than the mean (< 0.0253) predicted mortality with 100% accuracy (100% vs. 0%, logrank  $\chi^2 =$   
380 12.01,  $p = 5 \times 10^{-4}$ , Fig. 5I). This consistent statistics must be verified over larger sample size which is  
381 currently in pursuit. Under our current conditions, although showing weak statistical trends both of the  
382 order parameter (not shown) and the plasma albumin level (Fig. 5J) were not statistically significant  
383 determinants of in-hospital mortality.

384

385 **Discussion**

386 Human serum albumin is a pivotal protein with diverse multifaceted functions that are  
387 increasingly reported to reflect physiological and contribute to pathological states (32, 37). Closer to the  
388 context of COVID-19 pathophysiology, critical roles of HSA have been suggested as it acts as an anti-  
389 inflammatory and antioxidant protein (38), anticoagulant agent (39, 40), inhibitor of oxidative stress-  
390 mediated clotting and platelet activation (41, 42), drug-dependent allosteric carrier and regulator (43),  
391 and a potent heme scavenger that may also exhibit globin-like reactivity (44). In the light of these

392 established functions it is natural to suggest albumin as a frontline protection against COVID-19-  
393 associated lethality resulting from cytokine storm, oxidative stress, blood clotting, and the ensuing organ  
394 failure. Although hypoalbuminemia has been repeatedly reported as a predictor of mortality in COVID-19  
395 (31, 45), low albumin levels may result from surgery, dialysis, abdominal infections, liver failure,  
396 pancreatitis, respiratory distress, bypass surgery, ovarian problems caused by fertility drugs, and many  
397 other conditions. High prevalence of hypoalbuminemia in numerous disease states and the age/sex-  
398 dependent wide dynamic range of this protein concentration limits its diagnostic utility (32). As a result,  
399 we investigated biophysical parameters pertaining to HSA protein structure in whole blood and plasma  
400 of all groups as reflectors of this critical protein functions.

401 We designed the present study to explore how COVID-19-caused mortality is related to  
402 oxidative stress and whether ROS-induced albumin damage can be used to predict such outcome. To  
403 avoid disparities related to clinical statuses and interventional protocols we restricted our subject  
404 recruitment to a homogeneous cohort of patients in terms of diseases severity, hospitalization, and  
405 interventions. Both sexes were represented in the overall COVID-19 subjects (44% females) and sex was  
406 not found to affect mortality ( $p = 0.86$ ). The mean age of the studied subjects was  $66.7 \pm 8.9$  y (42-81),  
407 and non-survivors were slightly older ( $p = 0.04$ ). No other clinical or demographic characteristic showed  
408 statistically significant difference between survivors and non-survivors which further indicates the  
409 homogeneity of the studied pool of subjects.

410 Our current data provide converging and novel evidence that neutrophils are major players in  
411 oxidative stress associating inflammation in critically ill COVID-19 patients, especially those that don't  
412 survive the infection. We detected increased neutrophil count, increased ROS-positive neutrophil  
413 population, increased intracellular ROS level in these neutrophils, and a remarkably elevated hydrogen  
414 peroxide residue in plasma of non-survivor COVID-19 patients relative to control and survivor groups.  
415 Moreover, these oxidative stress measures were found to strongly correlate with EPR-detected

416 structural damages of HSA. Although we found a weak trend that albumin levels were inversely  
417 associated with overall mortality, a biophysical measure of structural changes inflicted on albumin (S/W)  
418 was found to consistently predict overall mortality ( $p = 0.008$ ) even with a relatively small  $n=22$  sample  
419 size. Moreover, plasma levels of hydrogen peroxide was also found to predict in-ICU mortality with even  
420 smaller number of analyzed samples ( $n=12$ ,  $p=0.049$ ). This substantiates the utilization of these  
421 parameters as accurate mortality predictors of critically ill COVID-19 patients. Determined threshold  
422 values of these parameters can possibly help identifying patients in need for urgent medical attention,  
423 and may provide novel markers to assess new candidates for COVID-19 treatments targeting HSA  
424 replacements. We thus suggest the importance of studying the potential effects of albumin replacement  
425 therapy on clinical outcomes of Covid-19 patients. Our results also provide new mechanistic insights into  
426 pathways that could be targeted to help prevent critical COVID illness and death; e.g. oxidative stress.

427

#### 428 **Acknowledgments**

429 The present work was funded by the Association of Friends of the National Cancer Institute and the  
430 Children's Cancer Hospital Foundation.

#### 431 **Authorship Contributions**

432 MAB, BAY, EAA-R, AAE, and AK performed experiments, analyzed results, and assisted in the manuscript  
433 preparation. Subjects' recruitment, ethical approvals, clinical follow-up and assessments were  
434 coordinated by RE-M. AMS, RH, DAI-R, MZ, and NE assisted in experimental work. MH, MEI-A, AEI-H, AE,  
435 AH, LLD and SA provided logistical support and critical manuscript revisions. SSA conceived and directed  
436 the project, designed experiments, analyzed data, and wrote the manuscript.

#### 437 **Disclosure of Conflicts of Interest**

438 All authors declare no competing financial interests.

439

## 440 **References**

- 441 1. Singh-Zocchi M, Andreasen A, Zocchi G. Osmotic pressure contribution of albumin to colloidal  
442 interactions. *Proceedings of the National Academy of Sciences of the United States of America*.  
443 1999;96(12):6711-5.
- 444 2. Bal W, Sokolowska M, Kurowska E, Faller P. Binding of transition metal ions to albumin: sites,  
445 affinities and rates. *Biochimica et biophysica acta*. 2013;1830(12):5444-55.
- 446 3. Stewart AJ, Blindauer CA, Berezenko S, Sleep D, Sadler PJ. Interdomain zinc site on human  
447 albumin. *Proceedings of the National Academy of Sciences of the United States of America*.  
448 2003;100(7):3701-6.
- 449 4. Fujiwara S, Amisaki T. Fatty acid binding to serum albumin: molecular simulation approaches.  
450 *Biochimica et biophysica acta*. 2013;1830(12):5427-34.
- 451 5. Wishart DS, Feunang YD, Guo AC, Lo EJ, Marcu A, Grant JR, et al. DrugBank 5.0: a major update  
452 to the DrugBank database for 2018. *Nucleic acids research*. 2018;46(D1):D1074-D82.
- 453 6. Ascenzi P, Bocedi A, Notari S, Fanali G, Fesce R, Fasano M. Allosteric modulation of drug binding  
454 to human serum albumin. *Mini reviews in medicinal chemistry*. 2006;6(4):483-9.
- 455 7. Vorum H, Honore B. Influence of fatty acids on the binding of warfarin and phenprocoumon to  
456 human serum albumin with relation to anticoagulant therapy. *The Journal of pharmacy and*  
457 *pharmacology*. 1996;48(8):870-5.
- 458 8. Cha MK, Kim IH. Glutathione-linked thiol peroxidase activity of human serum albumin: a possible  
459 antioxidant role of serum albumin in blood plasma. *Biochemical and biophysical research*  
460 *communications*. 1996;222(2):619-25.
- 461 9. Loban A, Kime R, Powers H. Iron-binding antioxidant potential of plasma albumin. *Clinical*  
462 *science*. 1997;93(5):445-51.
- 463 10. Fasano M, Curry S, Terreno E, Galliano M, Fanali G, Narciso P, et al. The extraordinary ligand  
464 binding properties of human serum albumin. *IUBMB life*. 2005;57(12):787-96.
- 465 11. Roche M, Rondeau P, Singh NR, Tarnus E, Bourdon E. The antioxidant properties of serum  
466 albumin. *FEBS letters*. 2008;582(13):1783-7.
- 467 12. Cross CE, van der Vliet A, O'Neill CA, Louie S, Halliwell B. Oxidants, antioxidants, and respiratory  
468 tract lining fluids. *Environmental health perspectives*. 1994;102 Suppl 10:185-91.
- 469 13. Halliwell B. Albumin--an important extracellular antioxidant? *Biochemical pharmacology*.  
470 1988;37(4):569-71.
- 471 14. Sitar ME, Aydin S, Cakatay U. Human serum albumin and its relation with oxidative stress.  
472 *Clinical laboratory*. 2013;59(9-10):945-52.
- 473 15. Laforge M, Elbim C, Frere C, Hemadi M, Massaad C, Nuss P, et al. Tissue damage from  
474 neutrophil-induced oxidative stress in COVID-19. *Nature reviews Immunology*. 2020;20(9):515-6.
- 475 16. Ge MT, Rananavare SB, Freed JH. ESR studies of stearic acid binding to bovine serum albumin.  
476 *Biochimica et biophysica acta*. 1990;1036(3):228-36.
- 477 17. Haeri HH, Schunk B, Tomaszewski J, Schimm H, Gelos MJ, Hinderberger D. Fatty Acid Binding to  
478 Human Serum Albumin in Blood Serum Characterized by EPR Spectroscopy. *ChemistryOpen*.  
479 2019;8(5):650-6.

- 480 18. Bhattacharya AA, Grune T, Curry S. Crystallographic analysis reveals common modes of binding  
481 of medium and long-chain fatty acids to human serum albumin. *Journal of molecular biology*.  
482 2000;303(5):721-32.
- 483 19. Curry S, Brick P, Franks NP. Fatty acid binding to human serum albumin: new insights from  
484 crystallographic studies. *Biochimica et biophysica acta*. 1999;1441(2-3):131-40.
- 485 20. Simard JR, Zunszain PA, Hamilton JA, Curry S. Location of high and low affinity fatty acid binding  
486 sites on human serum albumin revealed by NMR drug-competition analysis. *Journal of molecular*  
487 *biology*. 2006;361(2):336-51.
- 488 21. Head BP, Peart JN, Panneerselvam M, Yokoyama T, Pearn ML, Niesman IR, et al. Loss of caveolin-  
489 1 accelerates neurodegeneration and aging. *PloS one*. 2010;5(12):e15697.
- 490 22. E AA-R, Mahmoud AM, Khalifa AM, Ali SS. Physiological and pathophysiological reactive oxygen  
491 species as probed by EPR spectroscopy: the underutilized research window on muscle ageing. *The*  
492 *Journal of physiology*. 2016;594(16):4591-613.
- 493 23. Gordon LM, Looney FD, Curtain CC. Fatty-acid spin probe interactions with erythrocyte ghosts  
494 and liposomes prepared from erythrocyte ghosts. *The Journal of membrane biology*. 1989;111(2):155-  
495 68.
- 496 24. Marczak A, Kowalczyk A, Wrzesien-Kus A, Robak T, Jozwiak Z. Interaction of doxorubicin and  
497 idarubicin with red blood cells from acute myeloid leukaemia patients. *Cell biology international*.  
498 2006;30(2):127-32.
- 499 25. Sauerheber RD, Zimmermann TS, Esgate JA, VanderLaan WP, Gordon LM. Effects of calcium,  
500 lanthanum, and temperature on the fluidity of spin-labeled human platelets. *The Journal of membrane*  
501 *biology*. 1980;52(3):201-19.
- 502 26. Schreier S, Polnaszek CF, Smith IC. Spin labels in membranes. *Problems in practice*. *Biochimica et*  
503 *biophysica acta*. 1978;515(4):395-436.
- 504 27. Singh K, Mittal S, Gollapudi S, Butzmann A, Kumar J, Ohgami RS. A meta-analysis of SARS-CoV-2  
505 patients identifies the combinatorial significance of D-dimer, C-reactive protein, lymphocyte, and  
506 neutrophil values as a predictor of disease severity. *International journal of laboratory hematology*.  
507 2020.
- 508 28. Velavan TP, Meyer CG. Mild versus severe COVID-19: Laboratory markers. *International journal*  
509 *of infectious diseases : IJID : official publication of the International Society for Infectious Diseases*.  
510 2020;95:304-7.
- 511 29. Sun S, Cai X, Wang H, He G, Lin Y, Lu B, et al. Abnormalities of peripheral blood system in  
512 patients with COVID-19 in Wenzhou, China. *Clinica chimica acta; international journal of clinical*  
513 *chemistry*. 2020;507:174-80.
- 514 30. Yang AP, Liu JP, Tao WQ, Li HM. The diagnostic and predictive role of NLR, d-NLR and PLR in  
515 COVID-19 patients. *International immunopharmacology*. 2020;84:106504.
- 516 31. Violi F, Cangemi R, Romiti GF, Ceccarelli G, Oliva A, Alessandri F, et al. Is Albumin Predictor of  
517 Mortality in COVID-19? *Antioxidants & redox signaling*. 2020.
- 518 32. Levitt DG, Levitt MD. Human serum albumin homeostasis: a new look at the roles of synthesis,  
519 catabolism, renal and gastrointestinal excretion, and the clinical value of serum albumin measurements.  
520 *International journal of general medicine*. 2016;9:229-55.
- 521 33. Kazmierczak SC, Gurachevsky A, Matthes G, Muravsky V. Electron spin resonance spectroscopy  
522 of serum albumin: a novel new test for cancer diagnosis and monitoring. *Clinical chemistry*.  
523 2006;52(11):2129-34.
- 524 34. Yamasaki K, Hyodo S, Taguchi K, Nishi K, Yamaotsu N, Hirono S, et al. Long chain fatty acids alter  
525 the interactive binding of ligands to the two principal drug binding sites of human serum albumin. *PloS*  
526 *one*. 2017;12(6):e0180404.

- 527 35. Gantchev TG, Shopova MB. Characterization of spin-labelled fatty acids and hematoporphyrin  
528 binding sites interactions in serum albumin. *Biochimica et biophysica acta*. 1990;1037(3):422-34.
- 529 36. Pavicevic AA, Popovic-Bijelic AD, Mojovic MD, Susnjar SV, Bacic GG. Binding of doxyl stearic spin  
530 labels to human serum albumin: an EPR study. *The journal of physical chemistry B*. 2014;118(37):10898-  
531 905.
- 532 37. Coverdale JPC, Katundu KGH, Sobczak AIS, Arya S, Blindauer CA, Stewart AJ. Ischemia-modified  
533 albumin: Crosstalk between fatty acid and cobalt binding. *Prostaglandins, leukotrienes, and essential*  
534 *fatty acids*. 2018;135:147-57.
- 535 38. Inoue M, Nakashima R, Enomoto M, Koike Y, Zhao X, Yip K, et al. Plasma redox imbalance caused  
536 by albumin oxidation promotes lung-predominant NETosis and pulmonary cancer metastasis. *Nature*  
537 *communications*. 2018;9(1):5116.
- 538 39. Doweiko JP, Nompoggi DJ. The role of albumin in human physiology and pathophysiology, Part  
539 III: Albumin and disease states. *JPEN Journal of parenteral and enteral nutrition*. 1991;15(4):476-83.
- 540 40. Ronit A, Kirkegaard-Klitbo DM, Dohlmann TL, Lundgren J, Sabin CA, Phillips AN, et al. Plasma  
541 Albumin and Incident Cardiovascular Disease: Results From the CGPS and an Updated Meta-Analysis.  
542 *Arteriosclerosis, thrombosis, and vascular biology*. 2020;40(2):473-82.
- 543 41. Basili S, Carnevale R, Nocella C, Bartimoccia S, Raparelli V, Talerico G, et al. Serum Albumin Is  
544 Inversely Associated With Portal Vein Thrombosis in Cirrhosis. *Hepatology communications*.  
545 2019;3(4):504-12.
- 546 42. Tian W, Jiang W, Yao J, Nicholson CJ, Li RH, Sigurslid HH, et al. Predictors of mortality in  
547 hospitalized COVID-19 patients: A systematic review and meta-analysis. *Journal of medical virology*.  
548 2020;92(10):1875-83.
- 549 43. Fanali G, di Masi A, Trezza V, Marino M, Fasano M, Ascenzi P. Human serum albumin: from  
550 bench to bedside. *Molecular aspects of medicine*. 2012;33(3):209-90.
- 551 44. Ascenzi P, di Masi A, Fanali G, Fasano M. Heme-based catalytic properties of human serum  
552 albumin. *Cell death discovery*. 2015;1:15025.
- 553 45. Huang J, Cheng A, Kumar R, Fang Y, Chen G, Zhu Y, et al. Hypoalbuminemia predicts the  
554 outcome of COVID-19 independent of age and co-morbidity. *Journal of medical virology*.  
555 2020;92(10):2152-8.

556

557

558

**Table 1. Demographic and clinical characteristics of the studied subjects.**

|                                   | Sev-R        | Sev-D         | Tukey 95%-CI | <i>p</i> |
|-----------------------------------|--------------|---------------|--------------|----------|
| <b>n</b>                          | 11           | 14            |              |          |
| <b>Age (mean ± SD)</b>            | 62.6 ± 9.7   | 69.8 ± 7.0    | 0.33-14.11   | 0.04     |
| <b>Male</b>                       | 54.54%       | 57.14%        |              | 0.896†   |
| <b>sO<sub>2</sub> (mean ± SD)</b> | 78.57 ± 13.6 | 73.71 ± 17.07 | -20.42–10.7  | 0.52     |
| <b>Hypertension</b>               | 27.27%       | 42.85%        |              | 0.65†    |
| <b>Diabetes</b>                   | 18.18%       | 50%           |              | 0.09†    |
| <b>Cardiovascular disease</b>     | 0%           | 14.28%        |              | 0.2†     |
| <b>Cancer</b>                     | 0%           | 7.14%         |              | 0.36†    |
| <b>Bronchial asthma</b>           | 0%           | 7.14%         |              | 0.36†    |
| <b>ACE inhibitors</b>             | 0%           | 7.14%         |              | 0.36†    |
| <b>ARBs</b>                       | 9.09%        | 7.14%         |              | 0.85†    |
| <b>calcium channel blocker</b>    | 9.09%        | 7.14%         |              | 0.85†    |
| <b>Beta Blockers</b>              | 0%           | 7.14%         |              | 0.36†    |
| <b>Diuretics</b>                  | 0%           | 7.14%         |              | 0.36†    |
| <b>Sulphonylurea</b>              | 9.09%        | 21.42         |              | 0.4†     |
| <b>Biguanides</b>                 | 0%           | 7.14%         |              | 0.36†    |
| <b>Insulin</b>                    | 18.18%       | 7.14%         |              | 0.39†    |
| <b>Anticoagulant</b>              | 27.27%       | 35.71%        |              | 0.65†    |
| <b>Steroids</b>                   | 45.45%       | 57.14%        |              | 0.56†    |
| <b>Hydroxychloro-quine</b>        | 18.18%       | 7.14%         |              | 0.4†     |
| <b>IL-6 receptor antibody</b>     | 9.09%        | 35.71%        |              | 0.12†    |
| <b>Proton-pump inhibitor</b>      | 9.09%        | 14.28%        |              | 0.69†    |
| <b>Azithromycin</b>               | 9.09%        | 28.57%        |              | 0.22†    |
| <b>Cephalosporin</b>              | 18.18%       | 14.28%        |              | 0.79†    |
| <b>Carbapenem</b>                 | 9.09%        | 42.85%        |              | 0.06†    |
| <b>Oxazolidinone</b>              | 27.27%       | 35.71%        |              | 0.65†    |
| <b>Fluoro-quinolone</b>           | 36.36%       | 35.71%        |              | 0.97†    |
| <b>Nitrofurantoin</b>             | 9.09%        | 0%            |              | 0.25†    |
| <b>Remdesivir</b>                 | 0%           | 35.71%        |              | 0.026†   |
| <b>Ivermectin</b>                 | 0%           | 21.42%        |              | 0.10†    |

sO<sub>2</sub>, blood oxygen saturation level, ACE, angiotensin converting enzyme; ARBs, angiotensin receptor blockers; IL-6, interleukin-6. † *p* values obtained through Pearson's  $\chi^2$  test.

**Table 2. Laboratory parameters of the current study patients.**

|                                        | <b>Sev-R<br/>(mean ± SD)</b> | <b>Sev-D<br/>(mean ± SD)</b> | <b>Tukey 95%-CI</b> | <b><i>p</i></b> |
|----------------------------------------|------------------------------|------------------------------|---------------------|-----------------|
| <b>WBCs (x 10<sup>3</sup>/mL)</b>      | 10.85 ± 4.3                  | 12.5 ± 5.1                   | -2.62–5.94          | 0.42            |
| <b>Platelets (x 10<sup>6</sup>/mL)</b> | 274.3 ± 88.3                 | 233.1 ± 92.2                 | -116.7–34.1         | 0.27            |
| <b>INR</b>                             | 1.34 ± 0.63                  | 1.26 ± 0.23                  | -0.49–0.33          | 0.68            |
| <b>CRP (mg/L)</b>                      | 39.95 ± 42.6                 | 90.6 ± 66.9                  | -0.1–101.4          | 0.05            |
| <b>D-dimer (µg/mL)</b>                 | 1.38 ± 1.7                   | 3.79 ± 4.6                   | -0.81–5.64          | 0.13            |
| <b>IL-6 (pg/mL)</b>                    | 214.8 ± 442.6                | 393.0 ± 749.6                | -427–783            | 0.54            |
| <b>Ferritin</b>                        | 715.6 ± 426                  | 1081 ± 622                   | -94–826             | 0.11            |
| <b>Albumin (g/mL)</b>                  | 31.8 ± 4.8                   | 26.9 ± 5.1                   | -1.0–0.04           | 0.067           |
| <b>Hemoglobin (g/dL)</b>               | 12.18 ± 1.3                  | 12.16 ± 2.0                  | -1.5–1.46           | 0.97            |
| <b>ALT (U/L)</b>                       | 29.6 ± 20.2                  | 40.1 ± 37.3                  | -15.4–36.4          | 0.40            |
| <b>AST (U/L)</b>                       | 34.7 ± 20.5                  | 44.3 ± 29.8                  | -12.2–31.4          | 0.37            |
| <b>Serum creatinine<br/>(mg/dL)</b>    | 1.24 ± 0.8                   | 1.78 ± 1.7                   | -0.64–1.73          | 0.35            |

WBCs, white blood cells; INR, international normalized ratio; CRP, high-sensitivity C reactive protein; ICU, intensive care unit; PLTs, platelets; ALT, alanine transaminase; AST, aspartate transaminase. The Tukey’s calculated *p*-values as well as upper and lower 95%-confidence levels for the Sev-R vs. Sev-D means’ comparisons are given.



560 **Figure Legends**

561 **Fig. 1.** A) HSA crystal structure containing 7 copies of stearic acid. B) Representative EPR spectra of free  
562 and HSA-bound 5-DSA (B) and 16-DSA (C) in whole blood from the same COVID-9 recovered patient.  
563 Chemical structures of the two spin-labeled fatty acids are given on the right side of the figure.

564  
565 **Fig. 2. Hematologic cellular counts and neutrophil-ROS levels reflect severity and mortality in COVID-**  
566 **19 patients.** A) Representative flow cytometric diagrams comparing morphologic, hematologic, and ROS  
567 levels in control (representative of n=9; upper row), Sev-R (representative of n=10; middle row), and  
568 Sev-D (representative of n=11; lower row) groups. B) Heat diagram comparing lymphocyte, neutrophils,  
569 platelets, and DCF-positive neutrophil counts as percentage of total cell counts in all of the studied  
570 subjects. Yellow areas are either group separators or missing data due to insufficient sample size or  
571 processing errors. C) A diagram showing statistically positive correlation between neutrophil count and  
572 count of neutrophils stained positive for DCF dye in all groups (black dots denote controls; blue are Sev-  
573 R; and red represent Sev-D patients). D) When neutrophil counts were compared for all groups, both  
574 Sev-R and Sev-D groups showed statistically significant neutrophilia relative to control groups. However,  
575 only a weak trend has been observed when comparing the two groups with COVID-19. E) DCF staining  
576 revealed increased levels of ROS in Sev-R and Sev-D groups relative to control neutrophils. Sev-D  
577 showed a trend of increased ROS level relative to Sev-R group. Multiple comparisons were carried out  
578 using ANOVA followed by Tukey test and *p* values are given.

579  
580 **Fig. 3. Hydrogen peroxide levels in plasma and neutrophils reflect mortality in COVID-19 patients.**  
581 Catalase was used to specifically and quantitatively determine levels of hydrogen peroxide in identical  
582 plasma volumes collected from control (n=7), Sev-R (n=6), and Sev-D (n=7) groups. A) Oxygen levels are

583 monitored and recorded while 50 mL batches of plasma from control, Sev-R, and Sev-D subjects  
584 sequentially infused into tightly air-controlled O<sub>2</sub>k chamber containing catalase (315 Units/mL) in  
585 deoxygenated buffer. In addition to the initial rise due to residual oxygen in the added plasma samples,  
586 the decomposition of hydrogen peroxide in these samples produces oxygen quantitatively. B) To verify  
587 the assay we measured the released oxygen upon adding an increasing volume of standard hydrogen  
588 peroxide solution in PBS buffer with 0.2, 0.8, 1.2, and 1.6  $\mu$ M final concentrations; inset. Linear fitting of  
589 the plotted [O<sub>2</sub>] versus [H<sub>2</sub>O<sub>2</sub>] relation yielded a slope =  $0.47 \pm 0.03$  (Pearson's  $r = 0.994$ ,  $p = 5.6 \times 10^{-4}$ ),  
590 which is very close to the theoretically expected value of 0.5 as the catalase-mediated decomposition of  
591 one mole of H<sub>2</sub>O<sub>2</sub> produces  $\frac{1}{2}$ -mole O<sub>2</sub>. C) Plasma contents of H<sub>2</sub>O<sub>2</sub> in plasma significantly increased in  
592 the order Sev-D>Sev-R>Cont using ANOVA followed by Tukey test. D) Fluorescence imaging was used to  
593 assess levels of ROS in freshly isolated neutrophils using DCF (2,7-Dichlorodihydrofluorescein diacetate,  
594 green) staining in all groups. DAPI (4',6-diamidino-2-phenylindole, blue) binds strongly to adenine–  
595 thymine-rich regions in DNA thus mapping nuclei through emitting blue fluorescence. Merged DCF and  
596 DAPI images are shown on the third column. Images were acquired using Cytation 5 Cell Imaging Multi-  
597 Mode Reader (Agilent) and analyzed using Gen5 Software package 3.08. Scale bar: 100  $\mu$ m.

598

599 **Fig. 4. EPR spectroscopic analyses of HSA-fatty acid binding reveal strong dependence of binding on**  
600 **mortality in COVID-19 patients.** A) Albumin level in plasma of control (n=8), Sev-R (n=8), and Sev-D  
601 (n=10) groups showed that nonsurvivor COVID-19 patients exhibit statistically significant  
602 hypoalbuminemia. Comparisons between representative spectra showing changes in line shape that are  
603 related to mobility and microenvironmental statuses of HSA-bound 5-DSA (B) and 16-DSA (C) in whole  
604 blood of a control (black trace), a Sev-R (blue trace), and a Sev-D (red trace) patients. Calculated  
605 biophysical parameters including order parameter (D), rotational correlation time (E), and the ratio  
606 between strongly bound to weakly bound spin labels (S/W, F) as defined in Fig. 1 and described in

607 Methods section. Statistical comparisons by ANOVA followed by Tukey tests were used for means'  
608 comparisons and revealed remarkable decrease in the binding strengths and packing parameter of the  
609 local microenvironment surrounding the spin labels. All calculated parameters along with exact  $p$  values  
610 are given in the Supplementary Table 3. Water accessibility into albumin/fatty acids binding pockets are  
611 followed by reacting with ascorbate, which reduces nitroxide radicals into the EPR silent  
612 hydroxylamines. Representative EPR signal decays of 16-DSA in whole blood of control (G) and Sev-D (H)  
613 are shown. Kinetic traces ( $n=3$  per group) showing the reduction of 16-DSA (I) and 5-DSA (J) bound to  
614 HSA by sodium ascorbate in whole blood. Kinetic traces are shown as the percentage loss of the signal  
615 intensity of the middle peak ( $A/A_0$ ). All samples contained 0.26 mM spin label and 3 mM sodium  
616 ascorbate and measured at 37 °C. Weaker and slower disappearance of the EPR signal suggests  
617 inaccessible space towards the nitroxide moiety of the spin label.

618

619 **Fig. 5. Associations of oxidative stress measures and biophysical parameters with mortality outcome**  
620 **in COVID-19 subjects.** Linear correlations between plasma levels of hydrogen peroxide and EPR-  
621 calculated parameters pertaining to protein packing order parameter (A,B), fatty acid mobility  $\tau_c$  (C), and  
622 S/W ratio (D) in Control (black circles), Sev-R (blue circles), and Sev-D (red circles) groups ( $n=19-26$ ).  
623 Neutrophils are major sources of oxidative stress as evident by linear correlations between % DCF  
624 positive neutrophils and  $\tau_c$  (E) or S/W ratio (F). On each correlation, Pearson's  $r$  and  $p$  values are  
625 provided. **Kaplan–Meier estimates of time to mortality from blood sample collection during ICU**  
626 **hospitalization (G-J).** Logrank Kaplan–Meier survival analyses were carried out to estimate probability of  
627 survival of COVID-19 patients in relation with cut-off thresholds arbitrarily selected as the mean values  
628 of the analyzed parameters. For S/W, plasma  $[H_2O_2]$ , Risk Score defined as the  $\{(S/W)/[H_2O_2]\}$  ratio, and  
629 plasma [Albumin], the number of analyzed COVID-19 patients were 22, 12, 12, and 21; respectively.

630 Fig. 1.

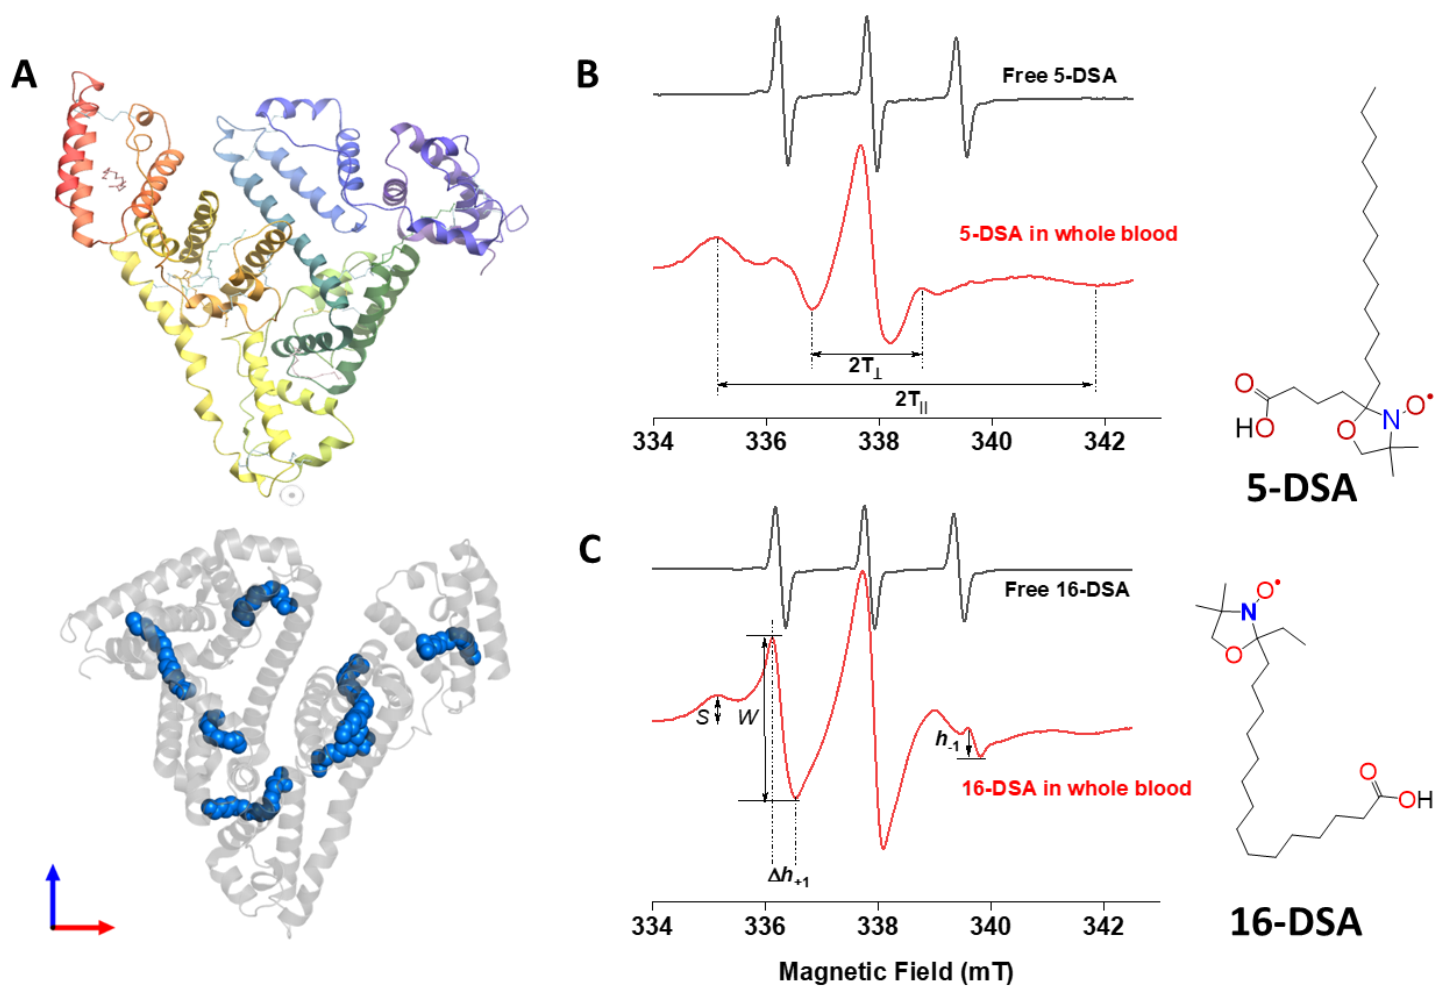

631 **Fig. 2.**

**A**

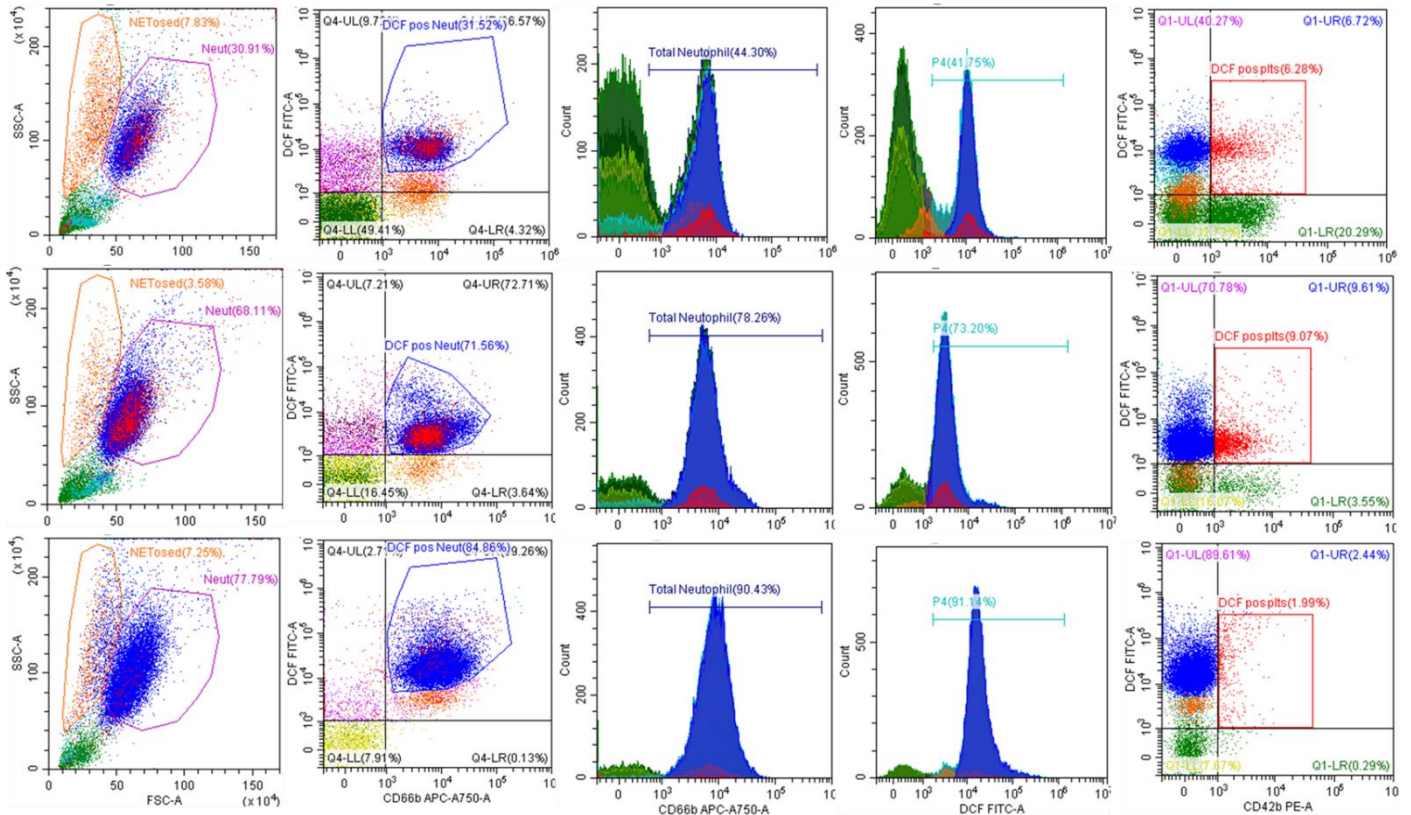

632

633

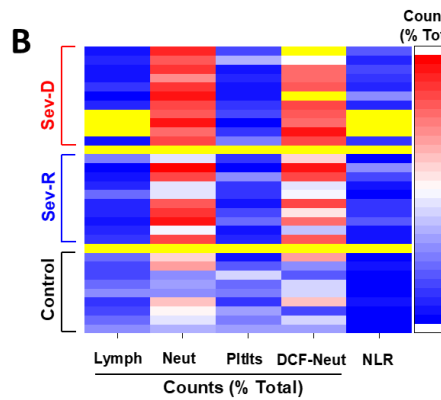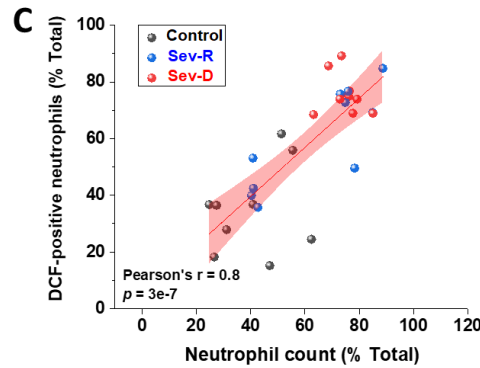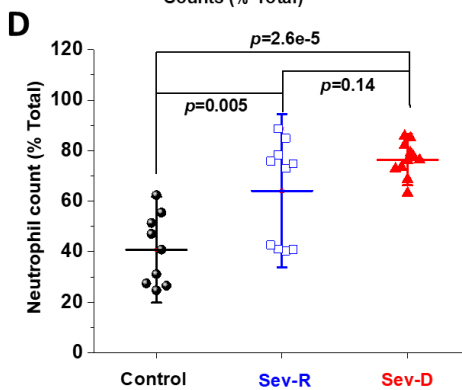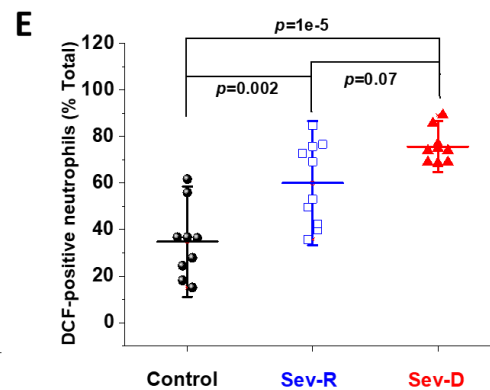

634 **Fig. 3.**

635

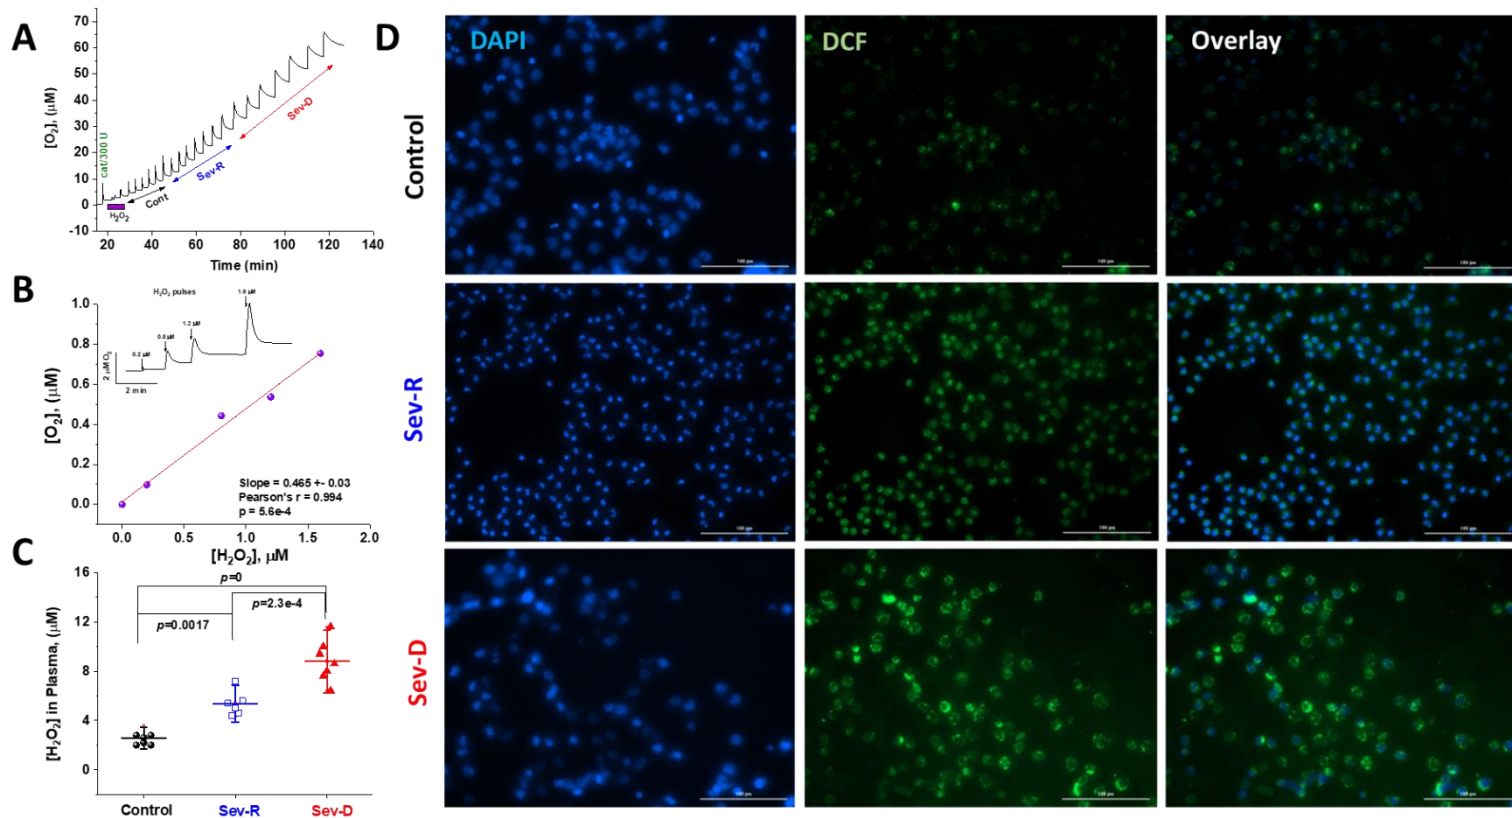



636 Fig. 4.

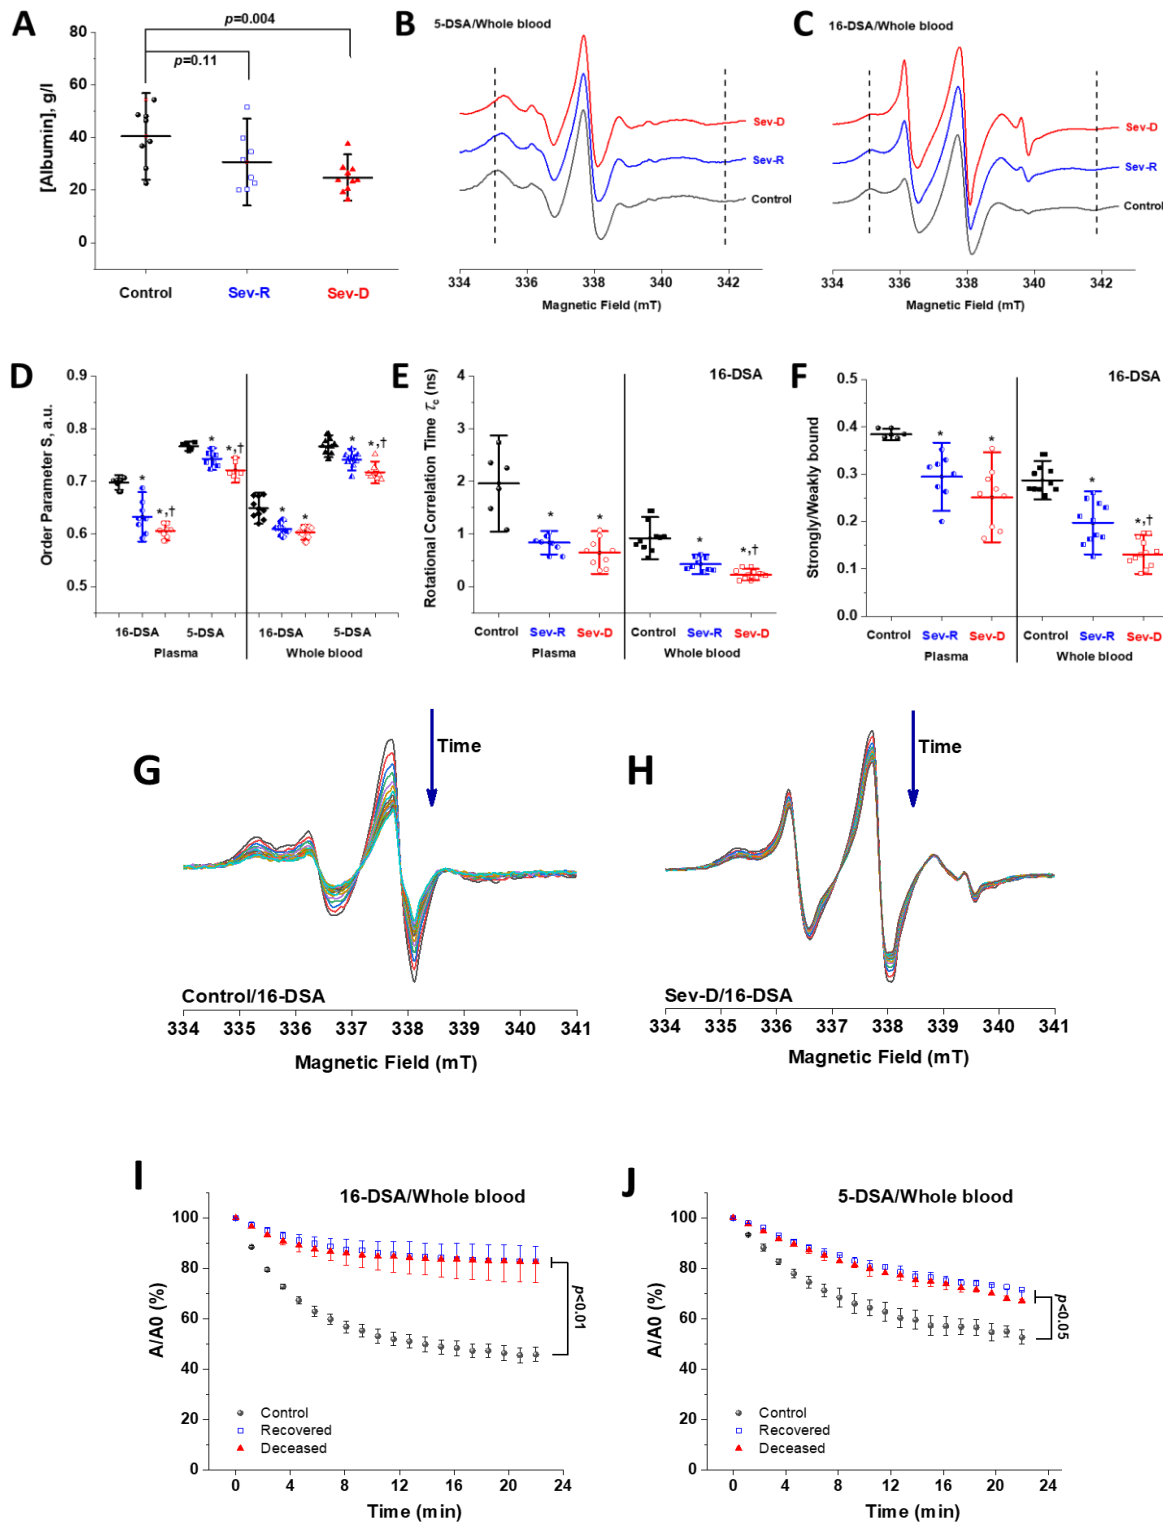

637

638 Fig. 5.

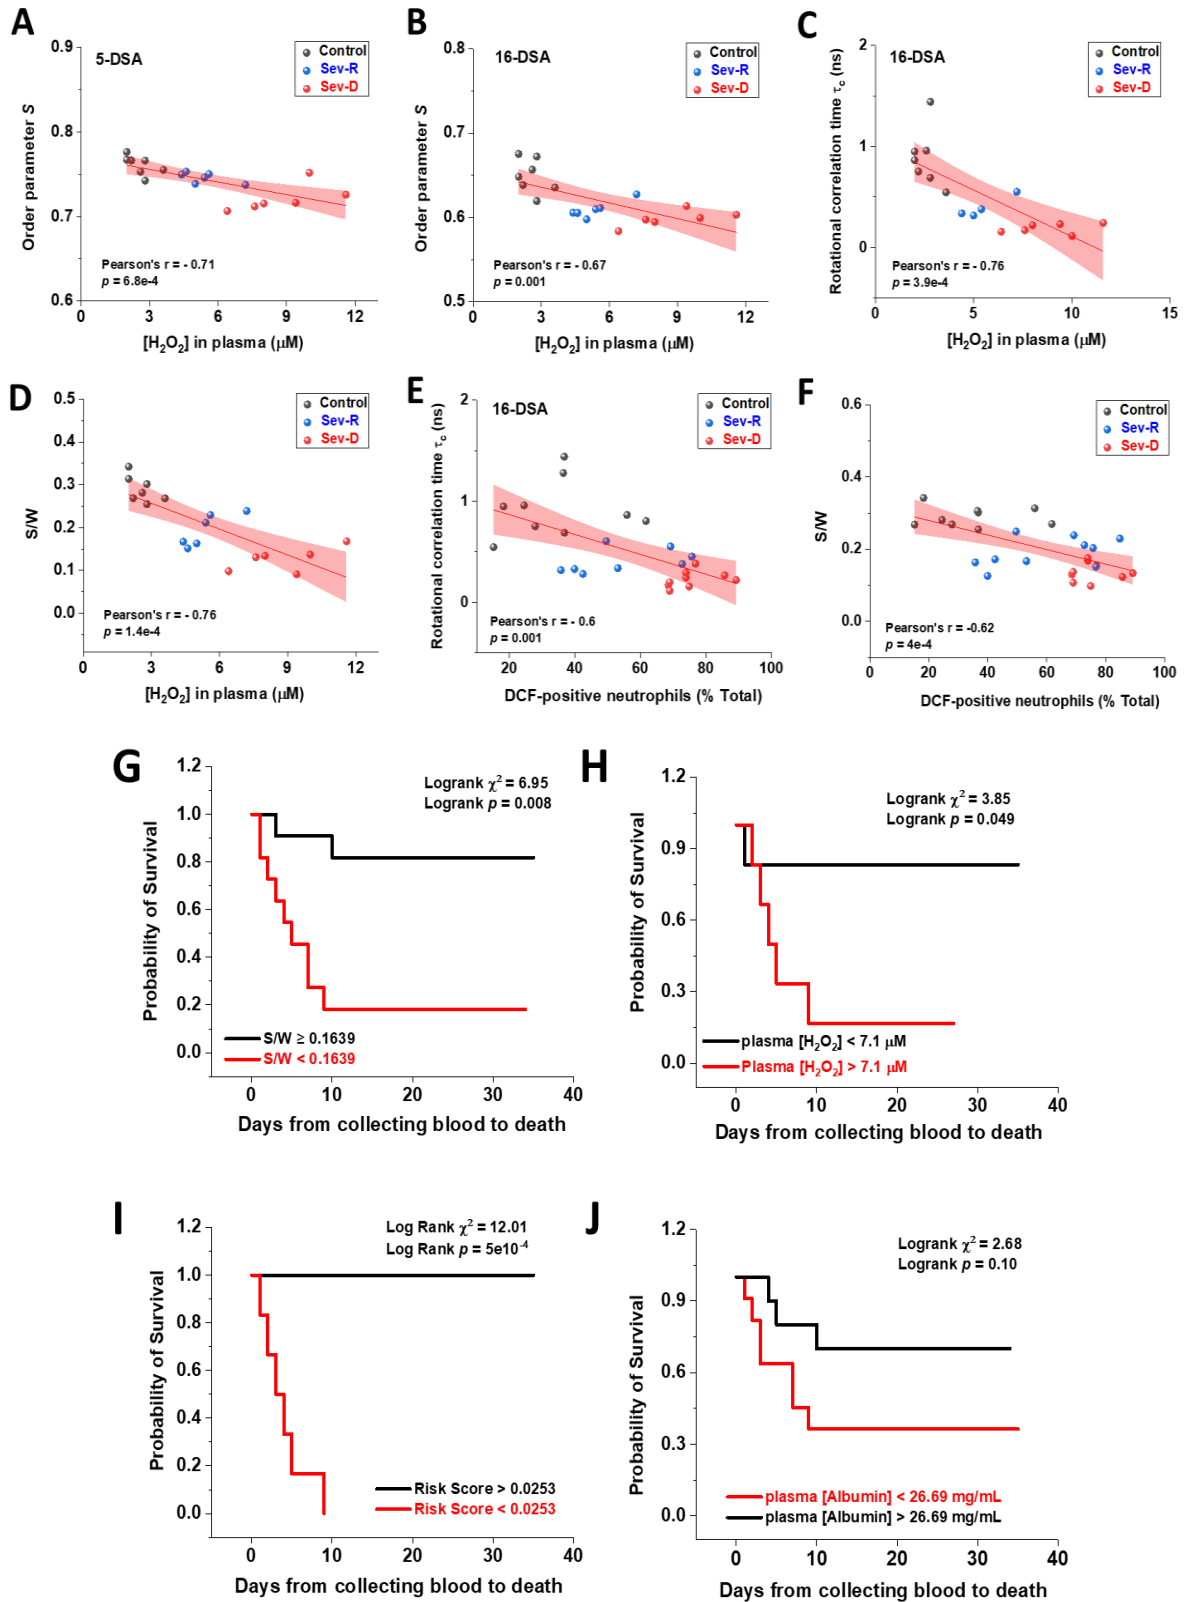

639
